# Supplementary material for: Development and validation of the OSASH score to predict overall survival of hepatocellular carcinoma after surgical resection: a dual-institutional study
Source: PubMed Central journal article supplement (PMC10598081; doi:10.1007/s00330-023-09725-7), 2023-05-16
Supplement: 330_2023_9725_MOESM1_ESM.pdf [file 330_2023_9725_MOESM1_ESM.pdf]

## **ELECTRONIC SUPPLEMENTARY MATERIAL**

**Development and validation of the OSASH score to predict overall survival of hepatocellular carcinoma after surgical resection: A dual-institutional study**

### **Table of Contents**

|                                                                                                                                                                                                                                 |           |
|---------------------------------------------------------------------------------------------------------------------------------------------------------------------------------------------------------------------------------|-----------|
| <b>Supplementary Material 1 MRI technique .....</b>                                                                                                                                                                             | <b>1</b>  |
| <b>Table S1 MRI sequences and parameters .....</b>                                                                                                                                                                              | <b>2</b>  |
| <b>Table S2 Characteristics of study patients before PSM and SMDs before and after PSM .....</b>                                                                                                                                | <b>5</b>  |
| <b>Table S3 Interobserver agreement for the OSASH score .....</b>                                                                                                                                                               | <b>6</b>  |
| <b>Table S4 Median OS, 3- and 5-year OS rates, and hazard ratios for BCLC stage subgroups and OSASH score risk subclasses in patients with BCLC stage 0-A and B-C HCC in the training and internal validation cohorts .....</b> | <b>7</b>  |
| <b>Figure S1 Calibration plots for the OSASH score in predicting 3-year overall survival in all cohorts .....</b>                                                                                                               | <b>8</b>  |
| <b>Figure S2 Kaplan-Meier curves demonstrating differences in OS between the OSASH-low and OSASH-high risk patients with HCC in six subgroups in the training cohort.....</b>                                                   | <b>9</b>  |
| <b>Figure S3 Kaplan-Meier curves demonstrating differences in OS between the OSASH-low and OSASH-high risk patients with HCC in six subgroups in the internal validation cohort.....</b>                                        | <b>10</b> |
| <b>Figure S4 A OSASH-low risk patient with BCLC stage C HCC in the internal validation cohort .....</b>                                                                                                                         | <b>11</b> |

## Supplementary Material 1

### MRI technique

At institution 1, gadoxetate disodium-enhanced magnetic resonance imaging (EOB-MRI) was performed with four 3.0-T systems (GE SIGNA™ Architect; GE SIGNA™ Premier; GE Discovery MR 750; Siemens MAGNETOM Skyra) and a 1.5-T system (uMR588), and extracellular contrast agent-enhanced MRI was performed with five 3.0-T systems (Siemens MAGNETOM Skyra; Siemens TrioTim; GE SIGNA™ Architect; GE Discovery MR 750; Philips Ingenia Elition X) and two 1.5-T systems (Siemens Avanto; uMR588). At institution 2, EOB-MRI was performed with a 3.0-T system (GE Discovery MR 750). Liver MRI protocols involved T2-weighted imaging, diffusion-weighted imaging (b values: 0-1200 s/mm<sup>2</sup> at institution 1; 0-3000 s/mm<sup>2</sup> at institution 2) with apparent diffusion coefficient (ADC) maps, T1-weighted in- and opposed-phase imaging, and dynamic T1-weighted imaging before and after injection of contrast agent in the late arterial phase, portal venous phase (60 s), delayed phase (ECA-MRI; 180s) or transitional phase (EOB-MRI; 180 s), and hepatobiliary phase (EOB-MRI; 20 minutes). At both institution 1 and 2, the arterial phase images were obtained either by the acquisition triggered 7 s after arrival of the contrast bolus in the celiac trunk or a multiple arterial phase (MAP) imaging technique. In specific, the MAP images were acquired with an 18 s breath hold 20 s after the contrast media injection, and further reconstructed with a temporal resolution of 3 s. For EOB-MRI, gadoxetate disodium (Primovist®; Bayer Schering Pharma AG) was administered intravenously at 1.0-2.0 ml/s (0.025 mmol/kg of body weight), with an immediately followed 20-30 ml saline flush. For ECA-MRI, gadopentetate dimeglumine (Magnevist®; Bayer Schering Pharma AG) or gadoterate meglumine (Dotarem®; Guerbet) or gadobenate dimeglumine (MultiHance®; Bracco) was administered intravenously at 2.5 ml/s (0.1 mmol/kg of body weight). MRI sequences and parameters are detailed in

**Table S1.**

**Table S1** MRI sequences and parameters

| <b>Sequence</b>                                                                           | <b>T1-weighted IP and OP imaging</b> | <b>Dynamic T1-weighted 3D GRE</b> | <b>T2-weighted 2D FSE</b> | <b>Diffusion-weighted imaging<sup>†</sup></b> |
|-------------------------------------------------------------------------------------------|--------------------------------------|-----------------------------------|---------------------------|-----------------------------------------------|
| <b>GE Discovery MR 750 3.0 Tesla (16-channel phased-array torso coil) (institution 1)</b> |                                      |                                   |                           |                                               |
| Repetition time (ms)                                                                      | 150                                  | 4.1                               | 6315                      | 9230                                          |
| Echo time (ms)                                                                            | 2.5/1.3                              | 1.9                               | 78                        | Minimum                                       |
| Flip angle (°)                                                                            | 70                                   | 15                                | 111                       | 90                                            |
| Section thickness (mm)                                                                    | 6                                    | 2                                 | 6                         | 6                                             |
| Spacing (mm)                                                                              | 2                                    | -                                 | 2                         | 2                                             |
| Matrix size                                                                               | 288×192                              | 512×512                           | 288×244                   | 128×128                                       |
| Field of view (mm <sup>2</sup> )                                                          | 420×420                              | 380×300                           | 360×280                   | 360×380                                       |
| Acquisition time (s)                                                                      | 31                                   | 15                                | RG                        | RG                                            |
| Fat suppression                                                                           | No                                   | Yes                               | Yes                       | Yes                                           |
| <b>GE Discovery MR 750 3.0 Tesla (8-channel body array coil) (institution 2)</b>          |                                      |                                   |                           |                                               |
| Repetition time (ms)                                                                      | NA                                   | 4.1                               | 6315                      | 9230                                          |
| Echo time (ms)                                                                            | NA                                   | 1.9                               | 78                        | Minimum                                       |
| Flip angle (°)                                                                            | NA                                   | 15                                | 111                       | 90                                            |
| Section thickness (mm)                                                                    | NA                                   | 2                                 | 6                         | 6                                             |
| Spacing (mm)                                                                              | NA                                   | -                                 | 2                         | 2                                             |
| Matrix size                                                                               | NA                                   | 512×512                           | 288×244                   | 128×128                                       |
| Field of view (mm <sup>2</sup> )                                                          | NA                                   | 380×300                           | 360×280                   | 360×380                                       |
| Acquisition time (s)                                                                      | NA                                   | NA                                | RG                        | RG                                            |
| Fat suppression                                                                           | NA                                   | Yes                               | Yes                       | Yes                                           |
| <b>GE SIGNA™ Architect 3.0 Tesla (30-channel body anterior coil) (institution 1)</b>      |                                      |                                   |                           |                                               |
| Repetition time (ms)                                                                      | 233.8                                | 3.9                               | 2400                      | 5000                                          |
| Echo time (ms)                                                                            | 2.3/1.1                              | 1.7                               | 85                        | Minimum                                       |
| Flip angle (°)                                                                            | 55                                   | 15                                | 111                       | 90                                            |
| Section thickness (mm)                                                                    | 7                                    | 3                                 | 7                         | 7                                             |
| Spacing (mm)                                                                              | 2                                    | -                                 | 2                         | 2                                             |
| Matrix size                                                                               | 160×288                              | 320×240                           | 320×192                   | 160×128                                       |
| Field of view (mm <sup>2</sup> )                                                          | 380×323                              | 380×380                           | 380×304                   | 380×342                                       |
| Acquisition time (s)                                                                      | 18                                   | 15                                | 34                        | RG                                            |
| Fat suppression                                                                           | No                                   | Yes                               | Yes                       | Yes                                           |
| <b>GE SIGNA™ Premier 3.0 Tesla (30-channel body anterior coil) (institution 1)</b>        |                                      |                                   |                           |                                               |
| Repetition time (ms)                                                                      | 146.8                                | 3.2                               | 2200                      | 5000                                          |
| Echo time (ms)                                                                            | 2.3/1.1                              | 1.4                               | 85                        | Minimum                                       |
| Flip angle (°)                                                                            | 55                                   | 15                                | 111                       | 90                                            |
| Section thickness (mm)                                                                    | 7                                    | 2.4                               | 7                         | 7                                             |
| Spacing (mm)                                                                              | 2                                    | -                                 | 2                         | 2                                             |
| Matrix size                                                                               | 320×192                              | 320×240                           | 320×224                   | 120×240                                       |
| Field of view (mm <sup>2</sup> )                                                          | 342×380                              | 380×380                           | 304×380                   | 380×380                                       |
| Acquisition time (s)                                                                      | 16                                   | 15                                | 47                        | RG                                            |
| Fat suppression                                                                           | No                                   | Yes                               | Yes                       | Yes                                           |

| <b>Siemens MAGNETOM Skyra 3.0 Tesla (18-channel body array coil) (institution 1)</b>       |           |         |         |         |
|--------------------------------------------------------------------------------------------|-----------|---------|---------|---------|
| Repetition time (ms)                                                                       | 81        | 3.95    | 2160    | 5600    |
| Echo time (ms)                                                                             | 2.72/1.4  | 1.92    | 100     | 68      |
| Flip angle (°)                                                                             | 70        | 9       | 160     | 90      |
| Section thickness (mm)                                                                     | 6         | 2.5     | 6       | 6       |
| Spacing (mm)                                                                               | 1.8       | -       | 1.8     | 1.8     |
| Matrix size                                                                                | 352×286   | 352×256 | 320×288 | 100×76  |
| Field of view (mm <sup>2</sup> )                                                           | 400×325   | 400×296 | 433×433 | 380×289 |
| Acquisition time (s)                                                                       | 24        | 14      | 36      | 233     |
| Fat suppression                                                                            | No        | Yes     | Yes     | Yes     |
| <b>Siemens TrioTim 3.0 Tesla (8-channel body anterior coil) (institution 1)</b>            |           |         |         |         |
| Repetition time (ms)                                                                       | 181       | 3.47    | 2700    | 5900    |
| Echo time (ms)                                                                             | 2.2/3.67  | 1.25    | 95      | 76      |
| Flip angle (°)                                                                             | 65        | 9       | 140     | 90      |
| Section thickness (mm)                                                                     | 6         | 2.4     | 6       | 6       |
| Spacing (mm)                                                                               | 7.8       | -       | 7.8     | 7.8     |
| Matrix size                                                                                | 256×131   | 320×133 | 320×147 | 192×154 |
| Field of view (mm <sup>2</sup> )                                                           | 410×269   | 434×257 | 442×254 | 393×393 |
| Acquisition time (s)                                                                       | 18        | 17      | RG      | 245     |
| Fat suppression                                                                            | No        | Yes     | Yes     | Yes     |
| <b>Siemens Avanto 1.5 Tesla (30-channel body anterior coil) (institution 1)</b>            |           |         |         |         |
| Repetition time (ms)                                                                       | 72        | 5.41    | 2530    | 3600    |
| Echo time (ms)                                                                             | 4.92/2.22 | 2.39    | 84      | 88      |
| Flip angle (°)                                                                             | 70        | 10      | 150     | 90      |
| Section thickness (mm)                                                                     | 6         | 2.5     | 6       | 6       |
| Spacing (mm)                                                                               | 7.8       | -       | 7.8     | 7.8     |
| Matrix size                                                                                | 256×158   | 320×138 | 256×187 | 192×115 |
| Field of view (mm <sup>2</sup> )                                                           | 328×225   | 382×238 | 293×251 | 310×232 |
| Acquisition time (s)                                                                       | 16        | 15      | 47      | 92      |
| Fat suppression                                                                            | No        | Yes     | Yes     | Yes     |
| <b>Siemens Avanto 1.5 Tesla (8-channel body anterior coil) (institution 1)</b>             |           |         |         |         |
| Repetition time (ms)                                                                       | 87        | 5.4     | 2710    | 2000    |
| Echo time (ms)                                                                             | 4.92/2.22 | 2.38    | 84      | 72      |
| Flip angle (°)                                                                             | 70        | 10      | 150     | 90      |
| Section thickness (mm)                                                                     | 7.5       | 2       | 7.5     | 7.5     |
| Spacing (mm)                                                                               | 9.75      | -       | 9.75    | 9.75    |
| Matrix size                                                                                | 256×187   | 320×131 | 256×177 | 192×125 |
| Field of view (mm <sup>2</sup> )                                                           | 308×380   | 241×407 | 308×380 | 308×379 |
| Acquisition time (s)                                                                       | 33        | 15      | 27      | 20      |
| Fat suppression                                                                            | No        | Yes     | Yes     | Yes     |
| <b>Philips Ingenia Elition X 3.0 Tesla (16-channel body anterior coil) (institution 1)</b> |           |         |         |         |
| Repetition time (ms)                                                                       | 164.53    | 4.20    | 1883.51 | 1653.65 |
| Echo time (ms)                                                                             | 2.30/1.15 | 0.00    | 90      | 60.29   |
| Flip angle (°)                                                                             | 50        | 10      | 90      | 90      |

|                                  |         |         |         |         |
|----------------------------------|---------|---------|---------|---------|
| Section thickness (mm)           | 6       | 3       | 6.8     | 7       |
| Spacing (mm)                     | 7.5     | 1.5     | 8.5     | 8.5     |
| Matrix size                      | 256×201 | 344×252 | 272×78  | 142×140 |
| Field of view (mm <sup>2</sup> ) | 360×360 | 380×380 | 380×380 | 380×380 |
| Acquisition time (s)             | 11      | 13      | 46      | 52      |
| Fat suppression                  | No      | Yes     | Yes     | Yes     |

**uMR588 1.5 Tesla (6-channel body anterior coil) (institution 1)**

|                                  |          |         |         |         |
|----------------------------------|----------|---------|---------|---------|
| Repetition time (ms)             | 117.6    | 4.2     | 2600    | 3350    |
| Echo time (ms)                   | 4.7/2.27 | 1.88    | 99.2    | 77      |
| Flip angle (°)                   | 60       | 10      | 90      | 90      |
| Section thickness (mm)           | 6.5      | 2.5     | 6.5     | 6.5     |
| Spacing (mm)                     | 1.3      | -       | 1.5     | 10      |
| Matrix size                      | 256×174  | 256×154 | 256×168 | 128×92  |
| Field of view (mm <sup>2</sup> ) | 320×400  | 255×400 | 427×320 | 320×400 |
| Acquisition time (s)             | 29       | 13      | 39      | RG      |
| Fat suppression                  | No       | Yes     | Yes     | Yes     |

FSE, fast spin-echo; GRE, gradient recall echo; IP, in-phase; MRI, magnetic

resonance imaging; NA, not available; OP, opposed-phase; RG, respiratory gating;

3D, three-dimensional; 2D, two-dimensional.

†Images were acquired under free breath.

**Table S2** Characteristics of study patients before PSM and SMDs before and after PSM

| Matching variable    | Before PSM                |                          |                | SMD <sup>§</sup> |           |
|----------------------|---------------------------|--------------------------|----------------|------------------|-----------|
|                      | Training cohort (n = 210) | ECA-MRI cohort (n = 661) | <i>P</i> value | Before PSM       | After PSM |
| Age (y) <sup>†</sup> | 52.1 ± 11.6               | 53.0 ± 10.9              | 0.302          | 0.078            | 0.128     |
| Sex (male)           | 173 (82.4)                | 581 (87.9)               | 0.054          | 0.145            | 0.063     |
| Cirrhosis            | 104 (49.5)                | 360 (54.5)               | 0.242          | 0.099            | 0.029     |
| BCLC stage           |                           |                          | <0.001         |                  |           |
| 0                    | 29 (13.8)                 | 87 (13.2)                |                | 0.019            | 0.014     |
| A                    | 101 (48.1)                | 437 (66.1)               |                | 0.361            | 0.000     |
| B                    | 34 (16.2)                 | 68 (10.3)                |                | 0.160            | 0.078     |
| C                    | 46 (21.9)                 | 69 (10.4)                |                | 0.277            | 0.058     |
| No. of death         | 42 (20.0)                 | 216 (32.7)               | 0.001          | 0.317            | 0.012     |

Unless indicated otherwise, data are the number of patients, with percentages in parentheses. SMD was defined as follows: <0.1, very small differences; 0.1–0.3, small differences; 0.3–0.5, moderate differences; and >0.5, large differences. Group comparison was performed with the Student's *t* test for continuous variable and Chi-square test or Fisher's exact test for categorical variables, as appropriate.

<sup>†</sup>Data are means ± standard deviations.

<sup>§</sup>Data are presented as the absolute value of SMD.

BCLC, Barcelona Clinic Liver Cancer; ECA-MRI, extracellular contrast agent-enhanced magnetic resonance imaging; PSM, propensity score matching; SMD, standardized mean difference.

**Table S3** Interobserver agreement for the OSASH score

| <b>Characteristic</b>      | <b>Training cohort<br/>(n = 210)</b> | <b>Internal<br/>validation cohort<br/>(n = 210)</b> | <b>External<br/>validation cohort<br/>(n = 100)</b> |
|----------------------------|--------------------------------------|-----------------------------------------------------|-----------------------------------------------------|
| Incomplete tumor "capsule" | 0.42 (0.29-0.55)                     | 0.42 (0.28-0.57)                                    | 0.46 (0.24-0.68)                                    |
| Mosaic architecture        | 0.40 (0.28-0.53)                     | 0.59 (0.48-0.71)                                    | 0.71 (0.56-0.86)                                    |
| Tumor multiplicity         | 0.73 (0.64-0.82)                     | 0.63 (0.52-0.74)                                    | 0.80 (0.70-0.90)                                    |
| AFP level                  | ...                                  | ...                                                 | ...                                                 |
| OSASH score <sup>†</sup>   | 0.72 (0.64-0.78)                     | 0.66 (0.57-0.73)                                    | 0.72 (0.62-0.80)                                    |

Unless indicated otherwise, data are  $\kappa$  statistics, with 95% confidence interval in parentheses.

<sup>†</sup>Data are intraclass correlation coefficients, with 95% confidence interval in parentheses.

Interobserver agreement was assessed by using  $\kappa$  statistics or intraclass correlation coefficients, as follows: 0.20 or less, poor agreement; 0.21-0.40, fair agreement; 0.41-0.60, moderate agreement; 0.61-0.80, substantial agreement; and greater than 0.80, almost perfect agreement.

AFP, alpha-fetoprotein.

**Table S4** Median OS, 3- and 5-year OS rates, and hazard ratios for BCLC stage subgroups and OSASH score risk subclasses in patients with BCLC stage 0-A and B-C HCC in the training and internal validation cohorts

| Variable and risk group | Training cohort (n = 210) |                           |                           |                           |                          |         | Internal validation cohort (n = 210) |                           |                           |                           |                      |         |
|-------------------------|---------------------------|---------------------------|---------------------------|---------------------------|--------------------------|---------|--------------------------------------|---------------------------|---------------------------|---------------------------|----------------------|---------|
|                         | No.                       | Median OS, months (95%CI) | 3-year OS rate, % (95%CI) | 5-year OS rate, % (95%CI) | Hazard Ratio (95%CI)     | P value | No.                                  | Median OS, months (95%CI) | 3-year OS rate, % (95%CI) | 5-year OS rate, % (95%CI) | Hazard Ratio (95%CI) | P value |
| BCLC stage              |                           |                           |                           |                           |                          | 0.178   |                                      |                           |                           |                           |                      | 0.444   |
| 0                       | 29                        | NA<br>(NA-NA)             | 100.0<br>(100.0-100.0)    | 100.0<br>(100.0-100.0)    | Reference                |         | 28                                   | NA<br>(NA-NA)             | 96.3<br>(89.4-100.0)      | 96.3<br>(89.4-100.0)      | Reference            |         |
| A                       | 101                       | NA<br>(NA-NA)             | 93.3<br>(88.2-98.7)       | 89.6<br>(82.7-97.0)       | 28.23<br>(0.02-40050.15) |         | 101                                  | NA<br>(NA-NA)             | 94.4<br>(89.7-99.3)       | 92.7<br>(87.0-98.6)       | 2.22<br>(0.28-17.76) |         |
| BCLC stage              |                           |                           |                           |                           |                          | 0.185   |                                      |                           |                           |                           |                      | <0.001  |
| B                       | 34                        | NA<br>(43.4-NA)           | 84.0<br>(71.9-98.2)       | 52.7<br>(35.9-77.3)       | Reference                |         | 40                                   | NA<br>(NA-NA)             | 85.5<br>(74.4-98.2)       | 85.5<br>(74.4-98.2)       | Reference            |         |
| C                       | 46                        | 56.4<br>(26.2-NA)         | 53.6<br>(40.3-71.1)       | 49.4<br>(35.7-68.4)       | 1.61<br>(0.79-3.29)      |         | 41                                   | 20.7<br>(13.6-NA)         | 43.6<br>(30.7-61.9)       | 31.2<br>(19.2-50.5)       | 7.73<br>(2.97-20.13) |         |
| BCLC stage 0-A HCC      |                           |                           |                           |                           |                          | <0.001  |                                      |                           |                           |                           |                      | 0.034   |
| Low risk                | 125                       | NA<br>(NA-NA)             | 97.5<br>(94.7-100.0)      | 94.1<br>(89.0-99.6)       | Reference                |         | 120                                  | NA<br>(NA-NA)             | 96.1<br>(92.5-99.9)       | 94.6<br>(90.0-99.4)       | Reference            |         |
| High risk               | 5                         | 27.0<br>(23.3-NA)         | 40.0<br>(13.7-100.0)      | 40.0<br>(13.7-100.0)      | 15.72<br>(3.87-63.77)    |         | 9                                    | NA<br>(NA-NA)             | 77.8<br>(54.9-100.0)      | 77.8<br>(54.9-100.0)      | 5.20<br>(1.01-26.84) |         |
| BCLC stage B-C HCC      |                           |                           |                           |                           |                          | 0.001   |                                      |                           |                           |                           |                      | <0.001  |
| Low risk                | 36                        | NA<br>(NA-NA)             | 86.3<br>(74.5-100.0)      | 67.5<br>(50.8-89.7)       | Reference                |         | 50                                   | NA<br>(NA-NA)             | 80.6<br>(70.0-92.9)       | 74.7<br>(62.6-89.2)       | Reference            |         |
| High risk               | 44                        | 29.7<br>(23.2-NA)         | 49.6<br>(36.3-67.7)       | 34.3<br>(21.3-55.4)       | 3.68<br>(1.66-8.18)      |         | 31                                   | 14.0<br>(11.3-NA)         | 36.4<br>(22.5-58.9)       | 28.7<br>(15.9-51.5)       | 5.30<br>(2.54-11.07) |         |

BCLC, Barcelona Clinic Liver Cancer; CI, confidence interval; HCC, hepatocellular carcinoma; NA, not available; OS, overall survival.



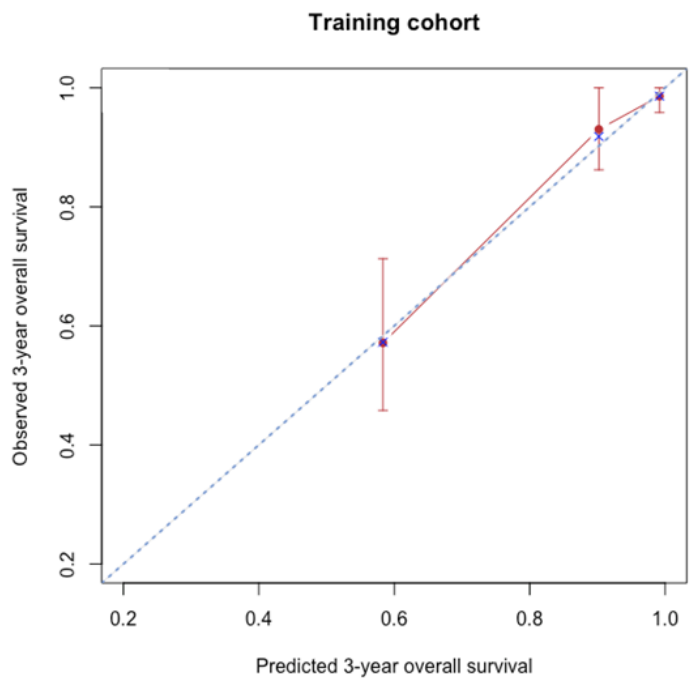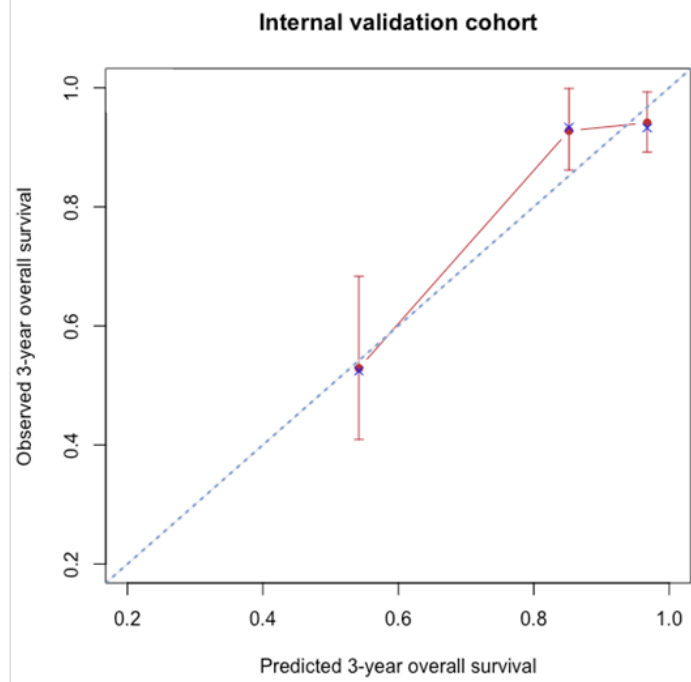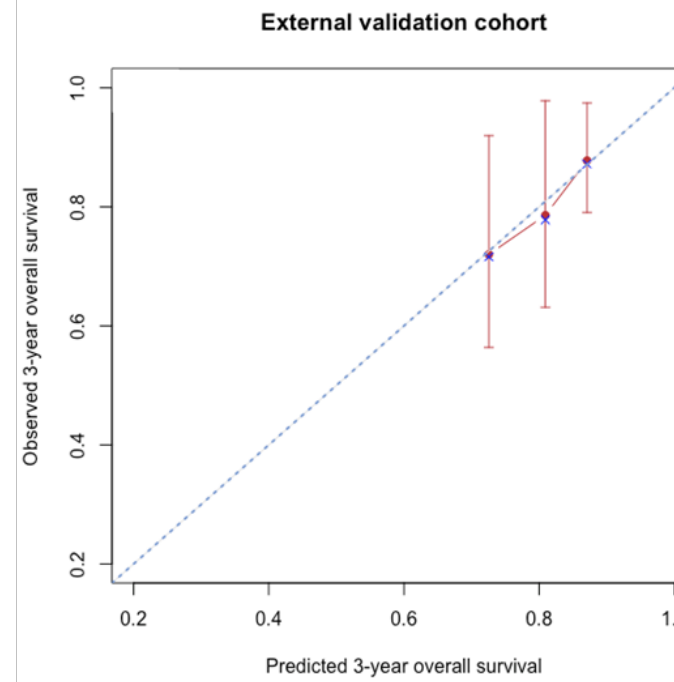

**Figure S1** Calibration plots for the OSASH score in predicting 3-year overall survival in all cohorts.

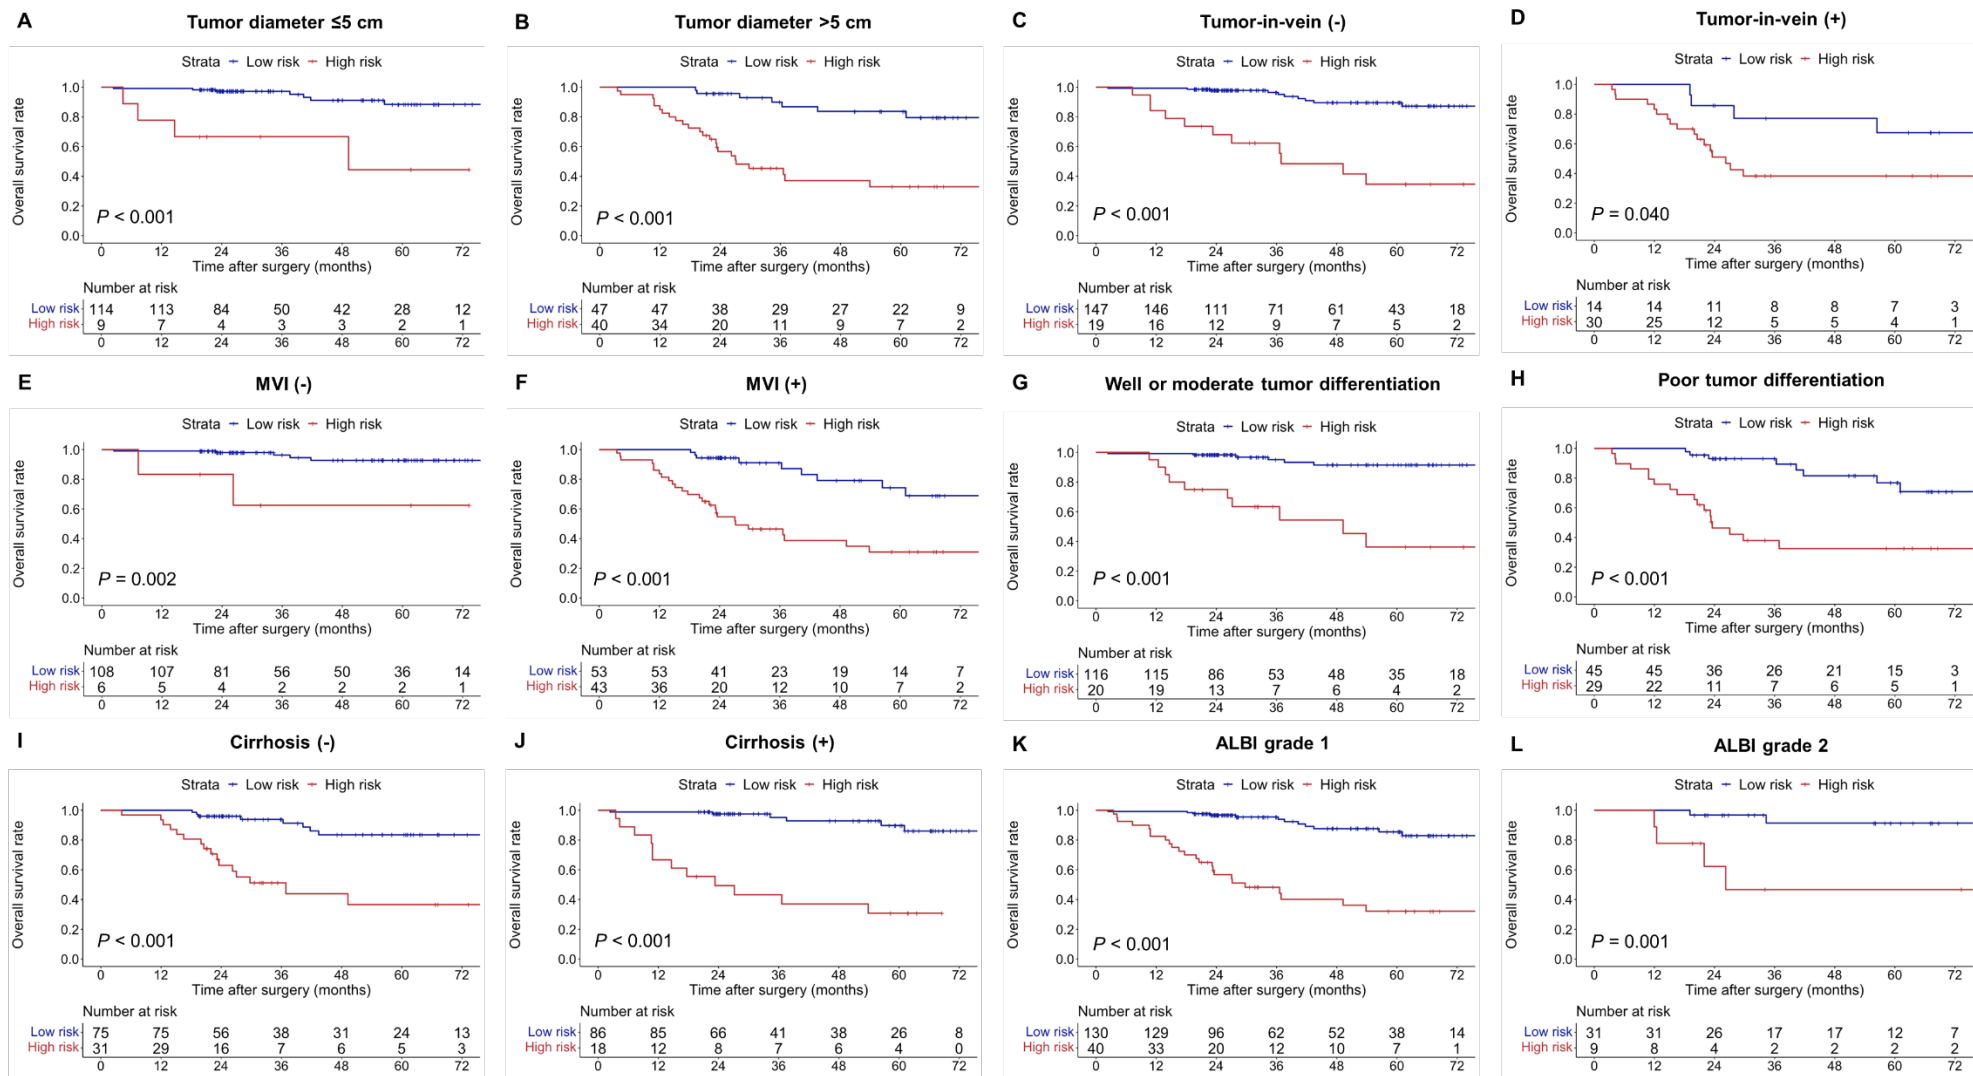

**Figure S2** Kaplan-Meier curves demonstrating differences in OS between the OSASH-low and OSASH-high risk patients with HCC in six subgroups in the training cohort. ALBI, albumin-bilirubin; HCC, hepatocellular carcinoma; MVI, microvascular invasion; OS, overall survival.

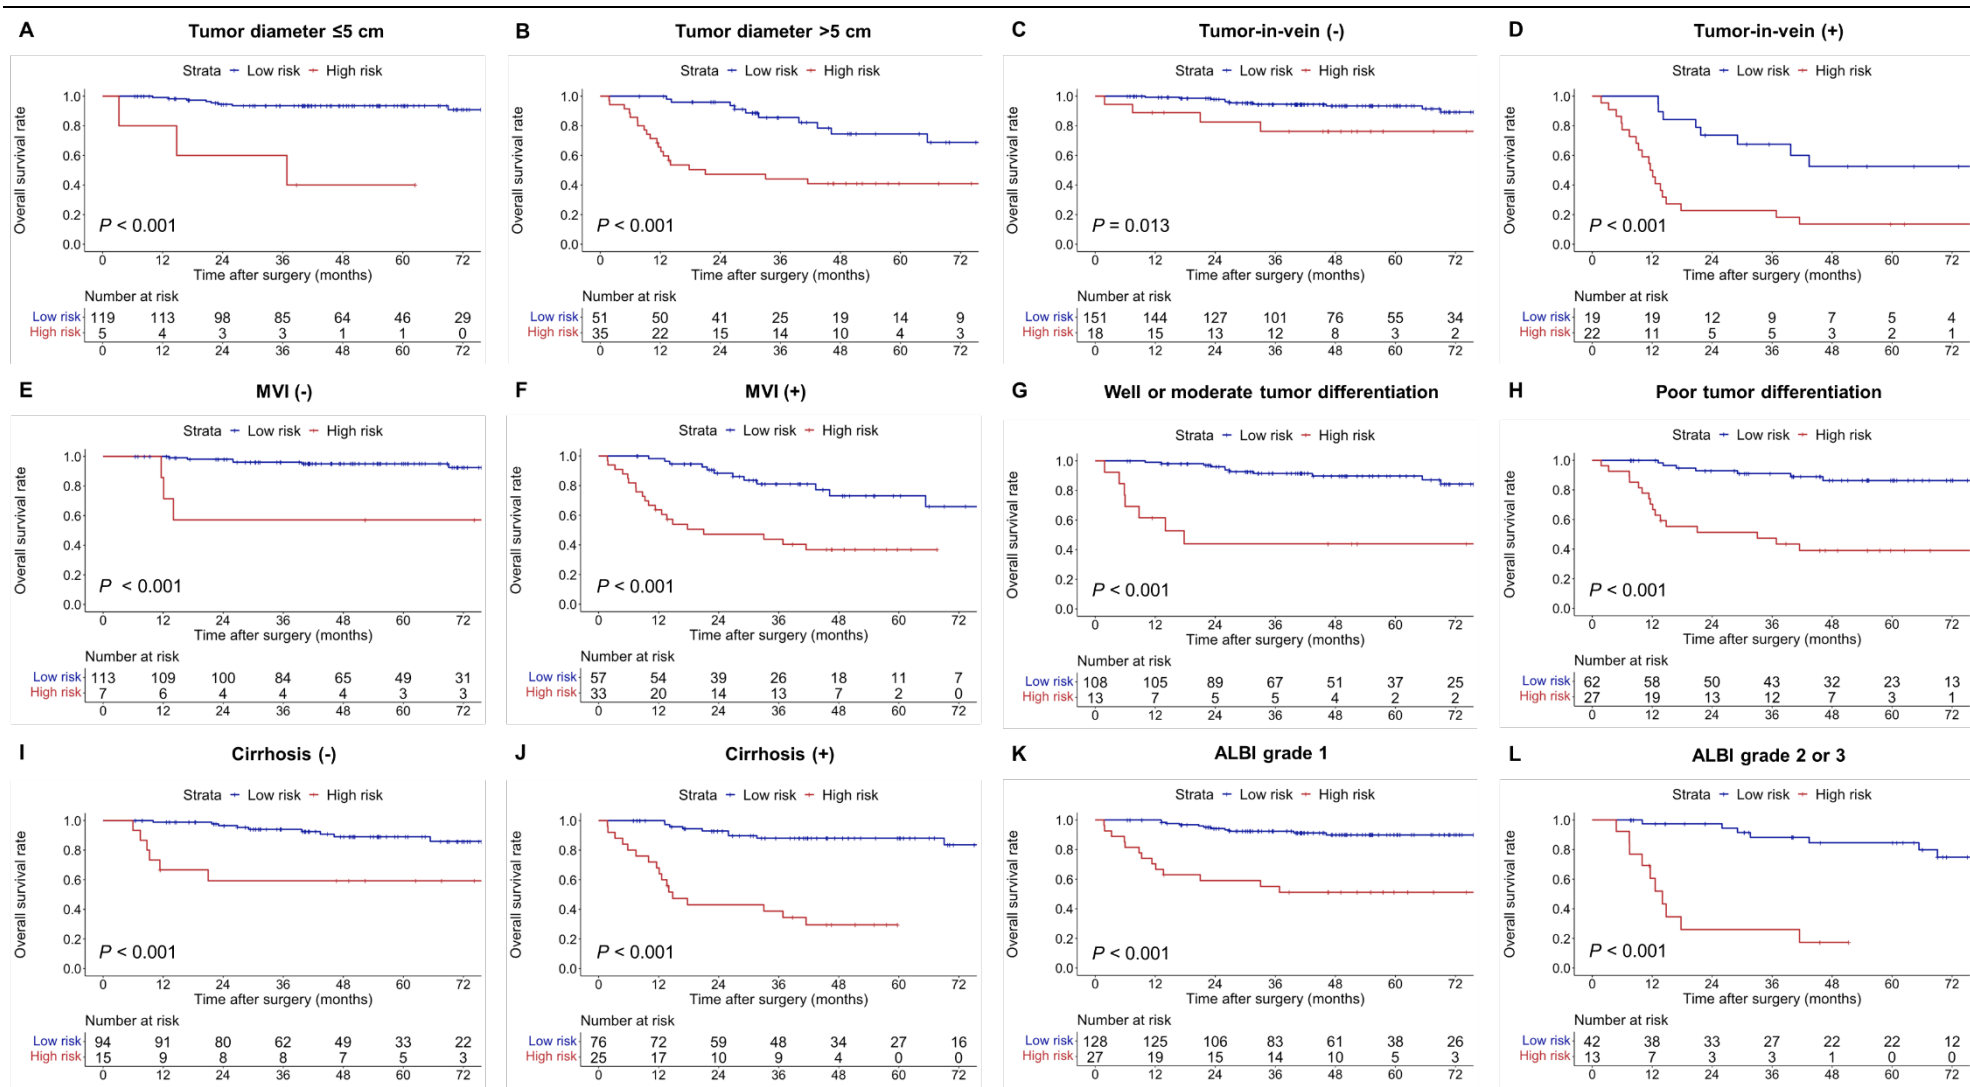

**Figure S3** Kaplan-Meier curves demonstrating differences in OS between the OSASH-low and OSASH-high risk patients with HCC in six subgroups in the internal validation cohort. ALBI, albumin-bilirubin; HCC, hepatocellular carcinoma; MVI, microvascular invasion; OS, overall survival.

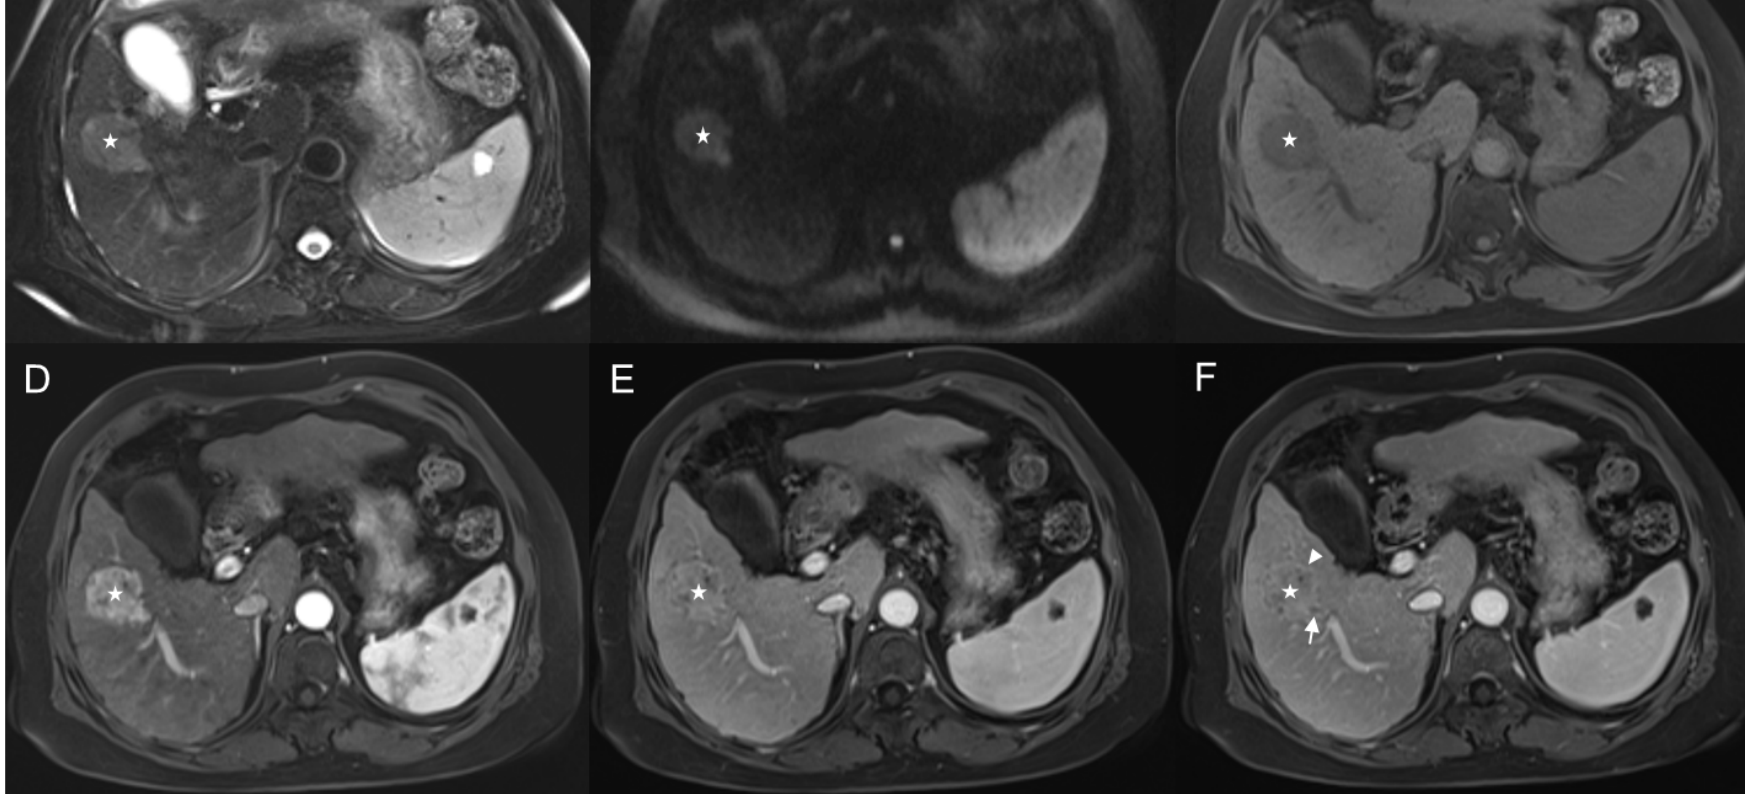

**Figure S4** An OSASH-low risk patient with BCLC stage C HCC in the internal validation cohort. Pathologically confirmed HCC in a 64-year-old woman with baseline serum AFP of 78 ng/ml. **(A–F)** Extracellular contrast agent-enhanced MRI demonstrated a 5.7 cm HCC in liver segment V. The tumor (star) showed mild to moderate hyperintensity on **(A)** T2-weighted image, diffusion restriction on **(B)** diffusion-weighted image ( $b = 1200 \text{ s/mm}^2$ ), hypointensity on **(C)** precontrast agent-enhanced T1-weighted image, nonrim arterial phase hyperenhancement on **(D)** late arterial phase image, nonsmooth tumor margin on **(E)** portal venous phase, and incomplete tumor “capsule” (arrowhead) and portal vein tumor thrombus (arrow) on **(F)** delayed phase image. This patient was classified as BCLC stage C before surgery. She had one risk factor (incomplete tumor “capsule”) for overall survival and was assigned 20 points, corresponding to the CONMA-low risk group ( $\leq 32$  points). The patient was alive throughout the follow-up period of 51.1 months. AFP, alpha-fetoprotein; BCLC, Barcelona Clinic Liver Cancer; HCC, hepatocellular carcinoma; MRI, magnetic resonance imaging.
